# Supplementary material for: Endoscopic third ventriculostomy versus shunt for pediatric hydrocephalus: a systematic literature review and meta-analysis
Source: Springer Nature journal article supplement (doi:10.1007/s00381-019-04203-2), 2019-05-25
Supplement: MOESM1 [file 16750600]

Supplementary Table 1. Risk of Bias Assessment for Observational Studies (Robins-I Tool)

| Study | Confounding | Selection | Classification of interventions | Deviations from intended interventions | Missing data | Measurement of data | Selection of the reported result |
| --- | --- | --- | --- | --- | --- | --- | --- |
| Cairo 2018 | moderate | low | low | low | moderate | low | low |
| Uche 2018 | moderate | low | low | low | low | low | low |
| Beuriat 2017 | moderate | low | low | low | moderate | low | low |
| Pan 2017 | moderate | low | low | low | moderate | low | low |
| Beuriat 2016 | moderate | low | low | low | low | low | low |
| Kulkarni 2016 | moderate | low | low | low | low | low | low |
| Paulsen 2016 | moderate | low | low | low | moderate | low | low |
| Jernigan 2014 | moderate | low | low | low | moderate | low | low |
| Elghandour 2010 | moderate | low | low | low | low | low | low |
| Appelgren 2010 | moderate | low | low | low | moderate | low | low |
| De Ribaupierre 2007 | moderate | low | low | low | moderate | low | low |
| Garton 2002 | moderate | low | low | low | moderate | low | low |
| Tuli 1999 | moderate | low | low | low | moderate | low | low |
